# Supplementary material for: Transgenic Expression of MicroRNA-181d Augments the Stress-Sensitivity of CD4+CD8+ Thymocytes
Source: PubMed Central journal article supplement (PMC3887031; doi:10.1371/journal.pone.0085274), 2014-01-09
Supplement: pone.0085274.s007.pdf [file pone.0085274.s007.pdf]

**Table S1. List of down-regulated genes more than 1.5-fold in miR-181d Tg-38 thymus compared to the wild type control.**

| Symbol        | Avg WT | SD | Avg Tg-38 | SD | Ratio (Tg-38/WT) | Accession      | Probe_ID     |
|---------------|--------|----|-----------|----|------------------|----------------|--------------|
| Mid1          | 26     | 2  | 6         | 2  | 0.24             | NM_183151.1    | ILMN_3159435 |
| Mpp5          | 6      | 1  | 2         | 1  | 0.31             | NM_019579.1    | ILMN_2594593 |
| LOC333685     | 9      | 2  | 3         | 0  | 0.37             | XM_289972.1    | ILMN_2685383 |
| 5133401H10Rik | 4      | 0  | 2         | 1  | 0.39             | AK019892       | ILMN_2551611 |
| Npc1          | 5      | 1  | 2         | 1  | 0.39             | AK044878       | ILMN_1252918 |
| LOC195284     | 6      | 1  | 2         | 2  | 0.4              | XM_111584.2    | ILMN_2528721 |
| Rbl1          | 6      | 1  | 2         | 1  | 0.4              | AK033402       | ILMN_1240408 |
| LOC333423     | 4      | 0  | 2         | 0  | 0.41             | XM_286167.2    | ILMN_2533496 |
| 5031439A09Rik | 10     | 2  | 4         | 0  | 0.41             | AK031444       | ILMN_2554118 |
| 0610035N01Rik | 4      | 1  | 2         | 0  | 0.42             | AK030365       | ILMN_1228112 |
| Ppp2r5c       | 5      | 1  | 2         | 1  | 0.42             | NM_012023      | ILMN_2742461 |
| Olfir244      | 6      | 0  | 3         | 1  | 0.42             | NM_001005520.1 | ILMN_3163040 |
| Erdr1         | 236    | 9  | 103       | 39 | 0.43             | NM_133362.1    | ILMN_1246153 |
| Zfp288        | 4      | 1  | 2         | 0  | 0.44             | XM_147215.1    | ILMN_1259424 |
| D030006P03Rik | 4      | 1  | 2         | 1  | 0.44             | AK083427       | ILMN_2577999 |
| 4832420L08Rik | 39     | 3  | 17        | 3  | 0.44             | AK029315       | ILMN_1238535 |
| Il17re        | 5      | 1  | 2         | 1  | 0.44             | NM_001034031.1 | ILMN_3162860 |
| 2900054C01Rik | 4      | 0  | 2         | 1  | 0.45             |                | ILMN_2438962 |
| F830002E14Rik | 143    | 35 | 65        | 10 | 0.45             | AK089567       | ILMN_1215076 |
| 1110036O03Rik | 17     | 2  | 8         | 1  | 0.46             | NM_176830.2    | ILMN_1231457 |
| LOC330240     | 3      | 1  | 2         | 1  | 0.46             | XM_285905.2    | ILMN_1216554 |
| Mnt           | 7      | 1  | 3         | 0  | 0.47             | NM_010813      | ILMN_1236972 |
| B430205M18Rik | 4      | 1  | 2         | 1  | 0.47             | AK046612       | ILMN_1239902 |
| Ifi203        | 4      | 0  | 2         | 1  | 0.47             | NM_008328.1    | ILMN_1241443 |
| BC048403      | 5      | 1  | 2         | 0  | 0.47             | NM_173022.2    | ILMN_2596666 |
| Mybl2         | 4      | 0  | 2         | 0  | 0.47             | NM_008652.2    | ILMN_2637886 |
| Nf1           | 5      | 1  | 2         | 0  | 0.47             | NM_010897.1    | ILMN_1231104 |
| Leprel2       | 8      | 2  | 4         | 0  | 0.47             | NM_013534.1    | ILMN_1239380 |
| Zfp361        | 5      | 0  | 2         | 1  | 0.48             | NM_007564.2    | ILMN_2427108 |
| Mad5          | 11     | 0  | 5         | 2  | 0.48             | AK032570       | ILMN_1222658 |
| Entpd4        | 6      | 1  | 3         | 1  | 0.48             | NM_026174      | ILMN_1226174 |
| D930049F02Rik | 8      | 1  | 4         | 1  | 0.48             | AK086749       | ILMN_1233004 |
| Plod2         | 14     | 3  | 7         | 1  | 0.49             | NM_011961      | ILMN_2770429 |
| Rcbtb2        | 7      | 1  | 3         | 1  | 0.49             | NM_134083.2    | ILMN_2812087 |
| Wbscr27       | 12     | 1  | 6         | 2  | 0.49             | NM_024479.1    | ILMN_1235834 |
| Il4           | 6      | 1  | 3         | 1  | 0.49             | NM_021283.1    | ILMN_2931334 |
| Smbp          | 4      | 0  | 2         | 1  | 0.49             | NM_133352      | ILMN_2603545 |
| 2210404G23Rik | 3      | 1  | 2         | 1  | 0.5              | NM_025958.1    | ILMN_2619869 |
| 4921521J11Rik | 4      | 0  | 2         | 1  | 0.5              | NM_027590      | ILMN_1225889 |
| Abhd3         | 4      | 0  | 2         | 1  | 0.5              | NM_134130.1    | ILMN_2677728 |
| Sprn          | 4      | 0  | 2         | 0  | 0.5              | NM_183147      | ILMN_2634644 |
| C230060D12Rik | 5      | 1  | 2         | 1  | 0.5              | AK082535       | ILMN_2580105 |
| Il17re        | 36     | 2  | 20        | 3  | 0.54             | NM_145826.2    | ILMN_2634933 |
| Il17re        | 34     | 6  | 18        | 3  | 0.54             | NM_001034029.1 | ILMN_3163006 |
| LOC240539     | 23     | 5  | 13        | 1  | 0.54             | XM_140607.1    | ILMN_1230605 |
| B230387C07Rik | 57     | 6  | 31        | 1  | 0.55             | AK046455       | ILMN_1216085 |
| A630040A01Rik | 27     | 5  | 15        | 3  | 0.55             | AK041811       | ILMN_2561533 |

|               |     |    |     |    |      |             |              |
|---------------|-----|----|-----|----|------|-------------|--------------|
| Cnn3          | 100 | 14 | 55  | 9  | 0.55 | NM_028044.1 | ILMN_2589785 |
| Fgfbp3        | 20  | 3  | 11  | 1  | 0.56 | NM_028263.1 | ILMN_2841593 |
| 2310047L21Rik | 57  | 3  | 32  | 1  | 0.56 | AK009885    | ILMN_1260397 |
| Rab9          | 25  | 5  | 14  | 2  | 0.57 | NM_019773.1 | ILMN_2783918 |
| Ptms          | 38  | 5  | 22  | 3  | 0.58 | NM_026988.1 | ILMN_2918838 |
| Gadd45a       | 42  | 6  | 25  | 3  | 0.58 | NM_007836.1 | ILMN_2947568 |
| Lig4          | 37  | 4  | 21  | 4  | 0.58 | NM_176953.2 | ILMN_2701654 |
| Xkrx          | 71  | 5  | 42  | 4  | 0.59 | NM_183319.2 | ILMN_3161225 |
| Dusp10        | 71  | 13 | 42  | 4  | 0.59 | NM_022019.2 | ILMN_2818964 |
| Dhcr24        | 50  | 7  | 29  | 2  | 0.59 | XM_131538.1 | ILMN_2747031 |
| Bach1         | 149 | 27 | 88  | 24 | 0.59 | NM_007520.1 | ILMN_2741677 |
| Slc7a11       | 89  | 12 | 53  | 4  | 0.59 | NM_011990.2 | ILMN_2948143 |
| Ppp1r3b       | 23  | 2  | 14  | 2  | 0.59 | NM_177741.2 | ILMN_2626098 |
| Dclre1c       | 26  | 0  | 15  | 5  | 0.6  | NM_146114.1 | ILMN_1240123 |
| Bcl2l1        | 96  | 14 | 57  | 3  | 0.6  | NM_009743.2 | ILMN_2698430 |
| 6330406I15Rik | 23  | 2  | 14  | 1  | 0.6  | NM_027519.1 | ILMN_2642517 |
| Sla           | 87  | 3  | 52  | 2  | 0.6  | NM_009192   | ILMN_1216337 |
| Tube1         | 73  | 14 | 44  | 3  | 0.6  | XM_125543.4 | ILMN_1250535 |
| E130007O11Rik | 23  | 2  | 14  | 1  | 0.6  | AK087403    | ILMN_1213840 |
| 6430601A21Rik | 42  | 8  | 25  | 3  | 0.61 | NM_175466.2 | ILMN_1217060 |
| Plekhf1       | 30  | 3  | 18  | 2  | 0.61 | NM_024413.1 | ILMN_2993334 |
| Dusp6         | 262 | 46 | 162 | 10 | 0.62 | NM_026268.1 | ILMN_2925711 |
| Fbxl12        | 95  | 8  | 58  | 7  | 0.62 | NM_013911.1 | ILMN_1224697 |
| BC011210      | 20  | 3  | 12  | 2  | 0.62 | NM_173863.1 | ILMN_1248891 |
| Chd2          | 86  | 17 | 53  | 6  | 0.62 | XM_145698.4 | ILMN_1213322 |
| 6330415F13Rik | 38  | 1  | 23  | 2  | 0.62 | NM_027533   | ILMN_1234698 |
| Rasa2         | 115 | 16 | 72  | 9  | 0.62 | NM_053268   | ILMN_2715328 |
| Cd79b         | 43  | 2  | 27  | 2  | 0.63 | NM_008339.1 | ILMN_2661523 |
| B930006L02Rik | 20  | 2  | 13  | 1  | 0.63 | NM_178764.3 | ILMN_2623112 |
| Tnfrsf1a      | 21  | 3  | 13  | 3  | 0.63 | NM_011609.2 | ILMN_2469333 |
| D330026F23Rik | 46  | 6  | 29  | 2  | 0.63 | AK084659    | ILMN_2579391 |
| Egln2         | 21  | 2  | 13  | 3  | 0.63 | NM_053208.2 | ILMN_2781805 |
| Zfpn1a2       | 26  | 2  | 16  | 2  | 0.63 | NM_011770.2 | ILMN_1217123 |
| Tgfb1i4       | 31  | 5  | 20  | 4  | 0.63 | NM_009366.1 | ILMN_2723108 |
| Vil2          | 453 | 72 | 290 | 13 | 0.64 | NM_009510   | ILMN_1232495 |
| A530089A20Rik | 259 | 38 | 165 | 23 | 0.64 | AK041191    | ILMN_2568488 |
| Dusp4         | 51  | 1  | 33  | 5  | 0.64 | NM_176933   | ILMN_2450767 |
| LOC383153     | 27  | 4  | 17  | 3  | 0.64 | XM_356899.1 | ILMN_2537361 |
| Chd9          | 60  | 4  | 38  | 3  | 0.64 | XM_284439   | ILMN_2697954 |
| Cyb5          | 219 | 27 | 141 | 18 | 0.64 | NM_025797.1 | ILMN_2966632 |
| Sox4          | 460 | 41 | 298 | 17 | 0.65 | NM_009238   | ILMN_2727116 |
| LOC383077     | 108 | 19 | 70  | 10 | 0.65 | XM_356845.1 | ILMN_2536687 |
| Lef1          | 73  | 2  | 48  | 7  | 0.65 | NM_010703   | ILMN_2648475 |
| Cutl1         | 26  | 3  | 17  | 2  | 0.65 | NM_009986.2 | ILMN_1229977 |
| LOC212399     | 60  | 6  | 39  | 6  | 0.65 | XM_137003.2 | ILMN_1244312 |
| 2700049H19Rik | 37  | 6  | 24  | 3  | 0.65 |             | ILMN_1229329 |
| Mll5          | 130 | 17 | 85  | 6  | 0.65 | XM_485570   | ILMN_1217776 |
| Ppa2          | 34  | 5  | 23  | 4  | 0.65 | NM_146141.1 | ILMN_1234589 |
| Ltb           | 194 | 18 | 127 | 8  | 0.65 | NM_008518.1 | ILMN_1258283 |
| Dgkg          | 140 | 7  | 92  | 8  | 0.66 | NM_138650   | ILMN_1237518 |

|               |     |    |     |    |      |             |              |
|---------------|-----|----|-----|----|------|-------------|--------------|
| Chrna9        | 116 | 8  | 76  | 7  | 0.66 | XM_132045.2 | ILMN_2717580 |
| Sypl          | 198 | 4  | 130 | 14 | 0.66 | NM_013635   | ILMN_2758720 |
| Hes6          | 32  | 1  | 21  | 2  | 0.66 | NM_019479.2 | ILMN_1214126 |
| Hist1h4k      | 35  | 4  | 23  | 1  | 0.66 | NM_178211.1 | ILMN_1243654 |
| 4930422J18Rik | 67  | 6  | 44  | 6  | 0.66 | NM_029035.2 | ILMN_1224336 |
| Slc9a9        | 46  | 3  | 30  | 6  | 0.66 | NM_177909.2 | ILMN_2637113 |
| Runx1         | 64  | 8  | 42  | 4  | 0.66 | NM_009821   | ILMN_2589107 |
| Nphs2         | 61  | 5  | 40  | 4  | 0.66 | NM_130456.2 | ILMN_2717146 |
| Chd1          | 106 | 16 | 70  | 8  | 0.66 | AK021188    | ILMN_1254296 |
| Camkk1        | 72  | 1  | 48  | 3  | 0.66 | NM_018883.1 | ILMN_1242310 |
| Chd4          | 34  | 6  | 22  | 2  | 0.67 | NM_145979.1 | ILMN_2654822 |
| F13a1         | 212 | 19 | 141 | 11 | 0.67 | NM_028784.2 | ILMN_2914938 |
| Hist1h4c      | 23  | 2  | 15  | 0  | 0.67 | NM_178208.1 | ILMN_2588244 |
| Dscr3         | 23  | 3  | 15  | 1  | 0.67 | NM_007834.1 | ILMN_2988631 |
