# Supplementary material for: Transgenic Expression of MicroRNA-181d Augments the Stress-Sensitivity of CD4+CD8+ Thymocytes
Source: PubMed Central journal article supplement (PMC3887031; doi:10.1371/journal.pone.0085274), 2014-01-09
Supplement: pone.0085274.s008.pdf [file pone.0085274.s008.pdf]

**Table S2. List of up-regulated genes more than 1.5-fold in miR-181d Tg-38 thymus compared to the wild type control.**

| Symbol        | Avg WT | SD | Avg Tg-38 | SD | Ratio (Tg-38/WT) | Accession      | Probe_ID     |
|---------------|--------|----|-----------|----|------------------|----------------|--------------|
| 5031439A09Rik | 25     | 1  | 164       | 12 | 6.432227176      | NM_026582      | ILMN_2704186 |
| Gpr177        | 51     | 9  | 280       | 37 | 5.509818961      | NM_026582.3    | ILMN_2996561 |
| Tlr1          | 3      | 1  | 12        | 3  | 4.817682379      | NM_030682.1    | ILMN_1236908 |
| Klrd1         | 25     | 4  | 119       | 24 | 4.798532756      | NM_010654.1    | ILMN_1255860 |
| V1rd6         | 2      | 0  | 8         | 2  | 4.796771918      | NM_030738.1    | ILMN_2971043 |
| Cxcl9         | 9      | 2  | 35        | 6  | 3.948071884      | NM_008599      | ILMN_1215862 |
| Rab4a         | 4      | 1  | 15        | 5  | 3.942609957      | NM_009003.1    | ILMN_1212902 |
| F2rl1         | 14     | 5  | 56        | 7  | 3.880890098      | NM_007974      | ILMN_2769567 |
| Gpr68         | 13     | 1  | 44        | 13 | 3.457300024      | NM_175493.2    | ILMN_2732996 |
| 0610005K03Rik | 2      | 2  | 8         | 1  | 3.394022323      | XM_128291.3    | ILMN_1248788 |
| LOC385615     | 9      | 2  | 31        | 5  | 3.393459347      | XM_358790.1    | ILMN_1218717 |
| Serpina3h     | 2      | 1  | 6         | 1  | 3.304124077      | NM_001034870.2 | ILMN_2889832 |
| Mmp13         | 3      | 1  | 10        | 1  | 3.27555415       | NM_008607.1    | ILMN_2737685 |
| Cxcr6         | 2      | 1  | 7         | 2  | 3.174954095      | NM_030712.1    | ILMN_1221846 |
| Gp2           | 3      | 2  | 10        | 1  | 3.171454828      | NM_025989.1    | ILMN_2904435 |
| Rgs11         | 2      | 1  | 8         | 2  | 3.121714332      | XM_128488.3    | ILMN_2667199 |
| Ttn           | 2      | 1  | 5         | 1  | 3.119298495      | NM_028004.2    | ILMN_3128792 |
| Fezf2         | 2      | 1  | 7         | 2  | 3.101517105      | NM_080433.1    | ILMN_2932692 |
| Gpr114        | 72     | 9  | 217       | 16 | 2.989124644      | NM_001033468.1 | ILMN_2856926 |
| Crhbp         | 2      | 1  | 6         | 1  | 2.942907545      | NM_198408.1    | ILMN_1231710 |
| Mucdhl        | 2      | 1  | 6         | 2  | 2.924644814      | NM_028069.1    | ILMN_2749556 |
| Expi          | 8      | 1  | 23        | 5  | 2.880741008      | NM_007969.2    | ILMN_1239717 |
| 0610041G09Rik | 9      | 4  | 26        | 4  | 2.877954098      | NM_183274      | ILMN_2693895 |
| 1700040A22Rik | 4      | 2  | 10        | 2  | 2.856126544      |                | ILMN_1246757 |
| Folr4         | 2      | 0  | 5         | 0  | 2.842131615      | NM_176807.2    | ILMN_2659388 |
| Slc6a4        | 2      | 1  | 5         | 2  | 2.839027231      | AK078634       | ILMN_2585676 |
| Igh-1a        | 20     | 5  | 55        | 13 | 2.746464752      | XM_354704.1    | ILMN_2633179 |
| Rptn          | 5      | 3  | 14        | 0  | 2.74475159       | NM_009100.1    | ILMN_2667665 |
| 4833405L16Rik | 2      | 1  | 5         | 1  | 2.741663248      | NM_177197.2    | ILMN_1216803 |
| E430019B13Rik | 2      | 1  | 5         | 2  | 2.735684918      | NM_172842.2    | ILMN_2668455 |
| Havcr2        | 2      | 1  | 6         | 1  | 2.735596975      | NM_134250.1    | ILMN_2721929 |
| D430044G18Rik | 5      | 2  | 15        | 3  | 2.73337498       | NM_172628      | ILMN_1240728 |
| Ttc8          | 2      | 1  | 5         | 1  | 2.712319941      | NM_198311.1    | ILMN_3141738 |
| Clcf1         | 2      | 0  | 4         | 1  | 2.709265385      | NM_019952.1    | ILMN_2926729 |
| C030009J22Rik | 2      | 1  | 6         | 1  | 2.64626957       |                | ILMN_2463583 |
| Slc1a2        | 2      | 1  | 4         | 1  | 2.63457163       | NM_001077514.1 | ILMN_3047516 |
| Rgs17         | 2      | 1  | 4         | 1  | 2.633365047      | NM_019958      | ILMN_1219289 |
| Inmt          | 5      | 3  | 14        | 3  | 2.613131742      | NM_009349.1    | ILMN_2803249 |
| Klra18        | 2      | 1  | 5         | 1  | 2.611725353      | NM_053153.1    | ILMN_1252295 |
| Flg           | 3      | 1  | 8         | 1  | 2.60791476       |                | ILMN_2455468 |
| Fabp9         | 3      | 2  | 7         | 0  | 2.552552811      | NM_011598.2    | ILMN_1221705 |
| 4933426K21Rik | 2      | 0  | 5         | 0  | 2.539350539      | AK016936       | ILMN_1247736 |
| Krt1-23       | 2      | 1  | 6         | 1  | 2.536934275      | NM_033373.1    | ILMN_2671165 |
| Klra7         | 3      | 1  | 8         | 1  | 2.51071401       | NM_014194.1    | ILMN_1227867 |
| Haao          | 5      | 0  | 13        | 1  | 2.476723804      | XM_354652      | ILMN_2607951 |
| Rgs3          | 3      | 1  | 7         | 2  | 2.461584018      | NM_019492      | ILMN_1241709 |
| E430002D04Rik | 37     | 3  | 90        | 12 | 2.459417806      | NM_172909.1    | ILMN_2629663 |

|               |    |    |     |    |             |                |              |
|---------------|----|----|-----|----|-------------|----------------|--------------|
| BC023892      | 7  | 1  | 17  | 0  | 2.439409125 | XM_135029      | ILMN_2502471 |
| Ccl4          | 25 | 7  | 62  | 4  | 2.436544006 | NM_013652.1    | ILMN_1223257 |
| Rab25         | 2  | 0  | 6   | 1  | 2.422053687 | NM_016899      | ILMN_2776087 |
| Ear6          | 3  | 0  | 6   | 1  | 2.419298966 | NM_053111.2    | ILMN_2871749 |
| Ccl21a        | 25 | 10 | 61  | 20 | 2.417315718 | NM_011335.1    | ILMN_2602139 |
| Dmkn          | 2  | 1  | 6   | 1  | 2.392062243 | NM_172899.2    | ILMN_1229763 |
| Mab21l2       | 2  | 0  | 5   | 1  | 2.390821214 | NM_011839.2    | ILMN_2595346 |
| Ifit3         | 54 | 10 | 128 | 14 | 2.379986566 | NM_010501.1    | ILMN_2944666 |
| Syt1          | 5  | 3  | 13  | 1  | 2.378897599 | NM_009306      | ILMN_1224963 |
| Actn2         | 51 | 3  | 120 | 11 | 2.377587506 | NM_033268.3    | ILMN_2764727 |
| Doc2g         | 2  | 1  | 4   | 1  | 2.346727778 | NM_021791.2    | ILMN_2704429 |
| Grasp         | 36 | 2  | 85  | 12 | 2.335730877 | NM_019518.2    | ILMN_2596396 |
| Pcsk4         | 2  | 1  | 5   | 1  | 2.324277385 | NM_008793.1    | ILMN_2629776 |
| Cyp2a5        | 9  | 4  | 21  | 4  | 2.314674473 | NM_007812.1    | ILMN_3159131 |
| Eppk1         | 5  | 3  | 12  | 2  | 2.309183804 | NM_144848.2    | ILMN_1243900 |
| 1700048O20Rik | 5  | 2  | 12  | 2  | 2.308789661 |                | ILMN_2479690 |
| B830021E24Rik | 46 | 5  | 106 | 14 | 2.306393526 | NM_198034      | ILMN_1248211 |
| Nkg7          | 69 | 5  | 158 | 40 | 2.305416588 | NM_024253.3    | ILMN_1217855 |
| Padi1         | 4  | 2  | 9   | 1  | 2.300495751 | NM_011059.1    | ILMN_2637742 |
| Grifin        | 8  | 1  | 18  | 3  | 2.289219398 | XM_132470.1    | ILMN_2676543 |
| Klk7          | 2  | 1  | 4   | 0  | 2.272605376 | NM_011872.2    | ILMN_1251558 |
| Ly6c          | 42 | 5  | 96  | 15 | 2.271728092 | NM_010741      | ILMN_1254927 |
| Cyp2s1        | 5  | 2  | 10  | 2  | 2.251382995 | NM_028775.2    | ILMN_2758264 |
| Mx1           | 2  | 1  | 4   | 1  | 2.251354578 | NM_010846      | ILMN_2707870 |
| Spink3        | 15 | 10 | 34  | 3  | 2.249422959 | NM_009258.2    | ILMN_2708477 |
| A930033C01Rik | 2  | 1  | 4   | 1  | 2.245221134 | XM_132396.4    | ILMN_1244474 |
| Adam19        | 24 | 2  | 53  | 12 | 2.236498585 | NM_009616      | ILMN_2772155 |
| Knsl1         | 2  | 1  | 5   | 1  | 2.232809636 | AK050778       | ILMN_1251822 |
| EG433016      | 2  | 1  | 5   | 1  | 2.225226993 | NM_001082547.1 | ILMN_2995688 |
| Cd86          | 41 | 6  | 91  | 10 | 2.216275774 | NM_019388.2    | ILMN_2743244 |
| Dnaja4        | 3  | 1  | 6   | 2  | 2.215278008 | NM_021422.2    | ILMN_2689986 |
| Gjb2          | 4  | 1  | 8   | 1  | 2.210591251 | NM_008125.2    | ILMN_2999627 |
| Art2b         | 2  | 1  | 4   | 1  | 2.200586669 | NM_019915.1    | ILMN_1215074 |
| 2210023G05Rik | 3  | 0  | 6   | 0  | 2.196393892 | NM_197999.1    | ILMN_2895284 |
| Mylk          | 2  | 0  | 4   | 1  | 2.191760791 | NM_139300      | ILMN_1219471 |
| 4930545K18Rik | 2  | 1  | 4   | 1  | 2.189081097 |                | ILMN_2455063 |
| Xcl1          | 21 | 5  | 45  | 8  | 2.181765753 | NM_008510.1    | ILMN_2948552 |
| Ccl21b        | 55 | 18 | 120 | 26 | 2.179000259 | NM_011124.3    | ILMN_1213286 |
| Bok           | 4  | 1  | 9   | 1  | 2.178332381 | NM_016778      | ILMN_2772077 |
| 2410014A08Rik | 4  | 0  | 8   | 1  | 2.177641125 | NM_175403.2    | ILMN_2997796 |
| Golph2        | 13 | 2  | 28  | 4  | 2.173210289 | NM_027307      | ILMN_2623536 |
| BC011468      | 7  | 3  | 16  | 3  | 2.170248639 | NM_144847.1    | ILMN_2594031 |
| 7420404O03Rik | 73 | 2  | 157 | 6  | 2.158486708 | AK078662       | ILMN_1239863 |
| Golph2        | 10 | 1  | 21  | 2  | 2.15411843  | NM_001035122.2 | ILMN_3148550 |
| 1200009I06Rik | 3  | 1  | 6   | 1  | 2.153327417 | NM_028807.1    | ILMN_2740207 |
| Temt          | 40 | 18 | 86  | 17 | 2.152063347 | NM_009349      | ILMN_1231445 |
| Ccl19         | 2  | 1  | 5   | 1  | 2.15035937  | NM_011888.2    | ILMN_2836386 |
| E130013N09Rik | 19 | 6  | 42  | 7  | 2.15002803  | XM_488964      | ILMN_1238627 |
| Gnmt          | 2  | 0  | 3   | 0  | 2.142335914 | NM_010321.1    | ILMN_2837816 |
| Cd7           | 4  | 1  | 8   | 2  | 2.128808824 | NM_009854.1    | ILMN_1252079 |

|               |     |    |     |    |             |             |              |
|---------------|-----|----|-----|----|-------------|-------------|--------------|
| D030029J20Rik | 2   | 1  | 4   | 1  | 2.126232509 |             | ILMN_1257291 |
| Sct           | 6   | 1  | 12  | 3  | 2.12579819  | NM_011328.1 | ILMN_2592834 |
| 5830467P10Rik | 4   | 1  | 9   | 1  | 2.125778449 | NM_198029.1 | ILMN_1234099 |
| H1f0          | 12  | 2  | 26  | 4  | 2.12255221  | NM_008197.2 | ILMN_1259559 |
| Tle6          | 41  | 6  | 86  | 10 | 2.115747559 | NM_053254.2 | ILMN_2900617 |
| Ctsw          | 154 | 15 | 324 | 51 | 2.105533866 | NM_009985.2 | ILMN_2721399 |
| E330039G21Rik | 4   | 1  | 8   | 1  | 2.104968415 | XM_203357.3 | ILMN_2667190 |
| Rhpn1         | 2   | 1  | 4   | 1  | 2.099025439 | NM_008164   | ILMN_2746985 |
| B430007K19Rik | 2   | 0  | 3   | 0  | 2.096879297 |             | ILMN_2446700 |
| 2410012C07Rik | 18  | 6  | 37  | 3  | 2.094565085 | XM_133920.3 | ILMN_2757844 |
| Il6ra         | 23  | 4  | 49  | 9  | 2.093147322 | AK020663    | ILMN_1255743 |
| Prkg2         | 2   | 0  | 4   | 1  | 2.092897138 | NM_008926.2 | ILMN_3160326 |
| Herc3         | 2   | 1  | 4   | 1  | 2.089156429 | NM_028705.2 | ILMN_2635218 |
| Pla1a         | 2   | 1  | 5   | 1  | 2.08636703  | NM_134102.2 | ILMN_2974343 |
| Tbx21         | 2   | 1  | 5   | 1  | 2.078552126 | NM_019507.1 | ILMN_2762983 |
| 4930431B09Rik | 7   | 0  | 15  | 1  | 2.077168288 | XM_207778.3 | ILMN_2684205 |
| 9830143E02Rik | 2   | 1  | 5   | 0  | 2.076703068 | AK036626    | ILMN_1219232 |
| 1700024K14Rik | 2   | 0  | 4   | 1  | 2.076478563 | AK075758    | ILMN_1241150 |
| G430091H17Rik | 7   | 3  | 14  | 1  | 2.076155672 | AK090072    | ILMN_1229197 |
| Chi3l1        | 7   | 1  | 15  | 4  | 2.074484162 | NM_007695.1 | ILMN_2609813 |
| Krt1-14       | 23  | 9  | 48  | 11 | 2.07398478  | NM_016958.1 | ILMN_2722616 |
| Trim2         | 2   | 1  | 4   | 1  | 2.068727096 | NM_030706.1 | ILMN_2511355 |
| Fjx1          | 2   | 1  | 5   | 1  | 2.06791993  | NM_010218   | ILMN_2689998 |
| D11Ertd686e   | 2   | 1  | 3   | 1  | 2.062505338 | XM_110968   | ILMN_2630138 |
| Idi1          | 2   | 0  | 4   | 1  | 2.062424961 | NM_145360   | ILMN_2590923 |
| 1600023A02Rik | 13  | 5  | 27  | 4  | 2.058332178 | NM_026323.1 | ILMN_1236758 |
| Abhd5         | 4   | 1  | 8   | 1  | 2.055273948 | NM_026179.1 | ILMN_2739295 |
| Ly116         | 12  | 8  | 25  | 2  | 2.05391389  | AK080934    | ILMN_1241598 |
| Oas2          | 27  | 5  | 56  | 8  | 2.05336191  | NM_145227.1 | ILMN_2670150 |
| D630040I23Rik | 17  | 1  | 36  | 4  | 2.051357773 |             | ILMN_2495167 |
| Chk           | 3   | 0  | 5   | 1  | 2.042214368 | AK053818    | ILMN_1255524 |
| Gfi1b         | 3   | 2  | 5   | 1  | 2.040366436 | NM_008114.2 | ILMN_2895557 |
| 1700019H03Rik | 11  | 2  | 22  | 5  | 2.034692714 | NM_183161.3 | ILMN_2999818 |
| C330015L04Rik | 3   | 1  | 6   | 1  | 2.030210844 | AK049236    | ILMN_1214565 |
| Ank           | 8   | 2  | 16  | 1  | 2.027697108 | NM_020332.2 | ILMN_1232621 |
| 9530008L14Rik | 2   | 0  | 3   | 0  | 2.023042463 | NM_175417.2 | ILMN_2962041 |
| Oas1b         | 5   | 2  | 11  | 2  | 2.021816963 | NM_011853.1 | ILMN_2613140 |
| Dip3b         | 21  | 6  | 43  | 4  | 2.021033715 | NM_145220.1 | ILMN_1219978 |
| AW536289      | 38  | 5  | 77  | 11 | 2.015309278 |             | ILMN_1251178 |
| Asns          | 4   | 0  | 9   | 2  | 2.014004554 | NM_012055.1 | ILMN_2643513 |
| Cyp27a1       | 3   | 1  | 7   | 1  | 2.008356198 | NM_024264.3 | ILMN_2620326 |
| 2310015J09Rik | 2   | 0  | 3   | 1  | 2.005994378 | NM_027983.1 | ILMN_1235868 |
| Pglyrp1       | 23  | 5  | 45  | 9  | 1.984884257 | NM_009402.1 | ILMN_2592486 |
| Card10        | 15  | 1  | 29  | 2  | 1.971761961 | NM_130859.2 | ILMN_2606660 |
| Il7r          | 95  | 10 | 186 | 24 | 1.964576355 | NM_008372.3 | ILMN_2680827 |
| Gpr18         | 74  | 15 | 144 | 25 | 1.942620903 | NM_182806.1 | ILMN_1213809 |
| Itgb7         | 100 | 2  | 192 | 34 | 1.918025402 | NM_013566.1 | ILMN_1227434 |
| Cbr2          | 34  | 9  | 66  | 11 | 1.91472794  | NM_007621.1 | ILMN_2756665 |
| Cd226         | 12  | 0  | 23  | 2  | 1.894863825 | NM_178687   | ILMN_1239753 |
| LOC270152     | 23  | 2  | 44  | 4  | 1.874122179 | XM_194453.3 | ILMN_1231204 |

|               |     |    |     |    |             |                |              |
|---------------|-----|----|-----|----|-------------|----------------|--------------|
| Ncf4          | 26  | 3  | 48  | 5  | 1.870122028 | NM_008677.1    | ILMN_2743013 |
| Hdc           | 32  | 10 | 60  | 10 | 1.855994377 | NM_008230.4    | ILMN_2965903 |
| Cd160         | 24  | 3  | 45  | 5  | 1.847454747 | NM_018767.2    | ILMN_2707181 |
| 2700038N03Rik | 27  | 5  | 50  | 4  | 1.842023466 | NM_027356.1    | ILMN_2605703 |
| Tcea2         | 24  | 2  | 43  | 5  | 1.832461972 | NM_009326      | ILMN_2777609 |
| A730063M14Rik | 13  | 3  | 23  | 1  | 1.821847678 |                | ILMN_2509830 |
| Zfp312        | 28  | 7  | 52  | 4  | 1.819875572 | NM_080433      | ILMN_2512430 |
| BC038822      | 13  | 1  | 23  | 3  | 1.816744079 | NM_172293.2    | ILMN_1237625 |
| Amica1        | 20  | 4  | 36  | 2  | 1.815258937 | NM_001005421.2 | ILMN_3160218 |
| St5           | 50  | 15 | 90  | 5  | 1.809002784 | NM_029811.1    | ILMN_3154820 |
| Slfn1         | 85  | 5  | 153 | 19 | 1.803248193 | NM_011407.1    | ILMN_2663930 |
| 1110007C02Rik | 25  | 2  | 45  | 7  | 1.800530987 | NM_027923.1    | ILMN_1225374 |
| A930034L06Rik | 19  | 5  | 33  | 3  | 1.795768881 | NM_175692.3    | ILMN_2952098 |
| B930041F14Rik | 29  | 3  | 52  | 7  | 1.779650259 | NM_178699      | ILMN_1250201 |
| Gpnmb         | 12  | 2  | 22  | 4  | 1.779291379 | NM_053110.2    | ILMN_2648669 |
| Ppic          | 39  | 9  | 69  | 8  | 1.765547608 | NM_008908.1    | ILMN_2810882 |
| Itgae         | 95  | 8  | 168 | 28 | 1.764554328 | NM_008399.1    | ILMN_1217629 |
| Rab15         | 13  | 4  | 23  | 2  | 1.763331665 | NM_134050.2    | ILMN_1217009 |
| Irf7          | 14  | 3  | 25  | 4  | 1.76277305  | NM_016850.1    | ILMN_1227573 |
| Al451557      | 53  | 5  | 93  | 17 | 1.761203083 | NM_001033207.1 | ILMN_3161790 |
| Samhd1        | 83  | 17 | 145 | 22 | 1.752833319 | NM_018851.2    | ILMN_1221736 |
| Aire          | 19  | 7  | 33  | 2  | 1.748489735 | NM_009646.1    | ILMN_2707921 |
| Siat10        | 83  | 11 | 145 | 10 | 1.744608268 | NM_018784      | ILMN_2695199 |
| Tmie          | 46  | 5  | 80  | 5  | 1.735747291 | NM_146260.1    | ILMN_1218037 |
| AA960558      | 114 | 7  | 198 | 30 | 1.733730818 | NM_133942.1    | ILMN_2708877 |
| Ddr1          | 14  | 4  | 25  | 4  | 1.713013405 | NM_007584.1    | ILMN_2713898 |
| Gcat          | 21  | 4  | 36  | 1  | 1.70566937  | NM_013847      | ILMN_2777696 |
| Ly6a          | 168 | 14 | 286 | 38 | 1.704984734 | NM_010738.2    | ILMN_1255416 |
| H19           | 49  | 5  | 84  | 14 | 1.701167992 | NR_001592.1    | ILMN_1256343 |
| Stag3         | 18  | 2  | 31  | 7  | 1.696591775 | NM_016964.1    | ILMN_2993843 |
| Scarf2        | 56  | 15 | 95  | 7  | 1.690798658 | NM_153790.1    | ILMN_2676127 |
| Nfix          | 22  | 1  | 38  | 1  | 1.680093241 | NM_010906.1    | ILMN_2742599 |
| BC013481      | 19  | 2  | 31  | 4  | 1.673543199 | NM_178446.2    | ILMN_2720836 |
| Il4i1         | 67  | 13 | 112 | 18 | 1.666117215 | NM_010215.1    | ILMN_2733778 |
| Bteb1         | 14  | 4  | 23  | 1  | 1.663875969 | NM_010638.2    | ILMN_1254031 |
| Prss19        | 142 | 15 | 236 | 31 | 1.660596058 | NM_008940.1    | ILMN_2675232 |
| Fcgrt         | 34  | 4  | 56  | 10 | 1.660006457 | NM_010189      | ILMN_1221819 |
| mt-Nd5        | 33  | 9  | 55  | 9  | 1.658883068 |                | ILMN_2504544 |
| 5830431A10Rik | 27  | 5  | 45  | 5  | 1.65344084  | XM_488664      | ILMN_2729252 |
| Lrrc59        | 15  | 1  | 25  | 3  | 1.652474177 | NM_133807.1    | ILMN_1241854 |
| Spint1        | 48  | 13 | 79  | 2  | 1.649648343 | NM_016907      | ILMN_1237186 |
| Ifi30         | 13  | 4  | 22  | 3  | 1.648352877 | NM_023065.2    | ILMN_2767918 |
| Eng           | 13  | 1  | 22  | 2  | 1.647027783 | NM_007932      | ILMN_1229161 |
| 9930108O06Rik | 16  | 6  | 26  | 1  | 1.642741583 | AK037075       | ILMN_2566321 |
| 2210411K11Rik | 30  | 2  | 49  | 4  | 1.638815135 | XM_355846      | ILMN_2736690 |
| H2-M2         | 106 | 29 | 173 | 17 | 1.636633664 | NM_008204.2    | ILMN_2964185 |
| Serpina3g     | 45  | 7  | 74  | 11 | 1.63621241  | XM_354694.1    | ILMN_2725927 |
| Gprc5b        | 12  | 2  | 20  | 1  | 1.634941421 | NM_022420.1    | ILMN_2611767 |
| Tnfaip8l2     | 21  | 3  | 34  | 4  | 1.634274919 | NM_027206.1    | ILMN_1249688 |
| BC035954      | 13  | 3  | 21  | 4  | 1.634047139 | NM_177569.2    | ILMN_2759853 |

|               |     |    |     |    |             |                |              |
|---------------|-----|----|-----|----|-------------|----------------|--------------|
| Tcea2         | 20  | 2  | 33  | 2  | 1.633384527 | NM_009326.1    | ILMN_2884728 |
| A630023P12Rik | 42  | 4  | 69  | 6  | 1.631876509 | NM_173766.2    | ILMN_2644193 |
| Al132321      | 28  | 2  | 45  | 1  | 1.622007697 | NM_178911.2    | ILMN_1234223 |
| Slco2b1       | 32  | 8  | 51  | 6  | 1.617660299 | NM_175316.2    | ILMN_2619707 |
| 3010031K01Rik | 22  | 6  | 36  | 3  | 1.616438332 |                | ILMN_2522460 |
| Gpr155        | 16  | 2  | 26  | 5  | 1.613616935 | XM_130346      | ILMN_1249003 |
| A930005H10Rik | 65  | 1  | 104 | 4  | 1.607752499 |                | ILMN_1250135 |
| Nt5e          | 19  | 3  | 30  | 1  | 1.60301515  | NM_011851.2    | ILMN_2813830 |
| 1700021K02Rik | 118 | 20 | 189 | 25 | 1.597385856 | NM_023064      | ILMN_2651010 |
| Ctsh          | 41  | 2  | 65  | 8  | 1.5960191   | NM_007801.1    | ILMN_2872058 |
| Rnf135        | 28  | 2  | 45  | 6  | 1.591314094 | NM_028019.1    | ILMN_2820379 |
| Hvcn1         | 35  | 5  | 56  | 5  | 1.59009142  | NM_001042489.1 | ILMN_3124528 |
| 2810001G20Rik | 61  | 8  | 95  | 6  | 1.577072845 |                | ILMN_2431398 |
| Sv2a          | 17  | 1  | 28  | 1  | 1.577015527 | NM_022030.2    | ILMN_2702887 |
| Sema4a        | 149 | 7  | 235 | 47 | 1.574300007 | NM_013658.2    | ILMN_1215120 |
| Alg8          | 45  | 2  | 71  | 1  | 1.568661563 | NM_199035      | ILMN_1237963 |
| Ng23          | 41  | 3  | 65  | 14 | 1.565869848 | XM_358322.1    | ILMN_1239632 |
| 2610318I01Rik | 32  | 5  | 50  | 5  | 1.56136272  | NM_153118.1    | ILMN_2746132 |
| Ifitm1        | 58  | 4  | 90  | 18 | 1.558511447 | NM_026820.2    | ILMN_1217180 |
| 0610039P13Rik | 65  | 4  | 101 | 10 | 1.556751968 | NM_028752      | ILMN_1243451 |
| Il2ra         | 17  | 3  | 26  | 2  | 1.555544239 | NM_008367      | ILMN_1233474 |
| Lyzs          | 145 | 23 | 225 | 8  | 1.55468843  | NM_017372      | ILMN_1252076 |
| Enc1          | 21  | 2  | 32  | 4  | 1.54864366  | NM_007930.3    | ILMN_1237886 |
| Anxa3         | 31  | 3  | 49  | 9  | 1.548609786 | NM_013470.1    | ILMN_3135781 |
| D14Erttd668e  | 57  | 6  | 88  | 6  | 1.546927245 | NM_199015.1    | ILMN_2827780 |
| Slc16a6       | 23  | 6  | 36  | 4  | 1.543959439 | NM_134038      | ILMN_1258950 |
| Sas           | 56  | 4  | 87  | 6  | 1.543571821 | NM_025982      | ILMN_2757599 |
| Faah          | 37  | 1  | 56  | 7  | 1.541168662 | NM_010173.2    | ILMN_2766930 |
| Cdkn1c        | 68  | 7  | 105 | 15 | 1.540457368 | NM_009876.2    | ILMN_2708203 |
| Lta           | 14  | 3  | 21  | 1  | 1.539832493 | NM_010735.1    | ILMN_2780247 |
| Card4         | 33  | 5  | 50  | 6  | 1.535871379 | NM_172729.1    | ILMN_1247710 |
| 4931431C02Rik | 23  | 3  | 36  | 4  | 1.535815193 | XM_486200      | ILMN_2760963 |
| Mettl1        | 21  | 1  | 32  | 2  | 1.535538579 | NM_010792.1    | ILMN_3001946 |
| Ccr8          | 16  | 3  | 24  | 4  | 1.535268098 | NM_007720.1    | ILMN_2724465 |
| Bcat1         | 20  | 5  | 30  | 2  | 1.531477565 | NM_007532.2    | ILMN_3131478 |
| Hap1          | 14  | 2  | 21  | 1  | 1.524232408 | NM_177981.1    | ILMN_1244829 |
| Agrn          | 80  | 20 | 122 | 16 | 1.521618126 | NM_021604      | ILMN_2674367 |
| Glipr2        | 82  | 10 | 124 | 11 | 1.508969642 | NM_027450      | ILMN_2773900 |
| Sorl1         | 25  | 5  | 37  | 5  | 1.504070601 | NM_011436      | ILMN_1249578 |
| Itgb4         | 29  | 5  | 44  | 0  | 1.500752978 | NM_133663.2    | ILMN_3144575 |
