# Supplementary material for: Transgenic Expression of MicroRNA-181d Augments the Stress-Sensitivity of CD4+CD8+ Thymocytes
Source: PubMed Central journal article supplement (PMC3887031; doi:10.1371/journal.pone.0085274), 2014-01-09
Supplement: pone.0085274.s009.pdf [file pone.0085274.s009.pdf]

**Table S3. Top 10 transcription factors with predicted target motifs among differentially regulated genes in the wild type control vs miR-181d Tg-38 thymocytes based on the significance level.** This enrichment analysis was performed using at least 10 genes for each category with hyper-geometric statistical test and Benjamini & Hochberg multiple test adjustment.

| <b>Down-regulated genes in miR-181d Tg thymocytes</b> |                        |                         |                          |
|-------------------------------------------------------|------------------------|-------------------------|--------------------------|
| <b>Transcription factors with target motifs</b>       | <b>Number of genes</b> | <b>Enrichment ratio</b> | <b>Adjusted p-value</b>  |
| SP1_GGGCGGR                                           | 159                    | 4.79                    | 1.02 x 10 <sup>-59</sup> |
| MAZ_GGGAGGRR                                          | 135                    | 5.22                    | 1.54 x 10 <sup>-54</sup> |
| LEF1_CTTTGT                                           | 123                    | 5.52                    | 4.73 x 10 <sup>-52</sup> |
| E12_CAGGTG                                            | 133                    | 4.72                    | 5.91 x 10 <sup>-49</sup> |
| FOXO4_TTGTTT                                          | 110                    | 4.76                    | 2.48 x 10 <sup>-40</sup> |
| AP4_CAGCTG                                            | 95                     | 5.57                    | 3.72 x 10 <sup>-40</sup> |
| FREAC2_RTAAACA                                        | 67                     | 6.38                    | 1.75 x 10 <sup>-31</sup> |
| NFAT_TGAAA                                            | 92                     | 4.36                    | 1.25 x 10 <sup>-30</sup> |
| MYC_CACGTG                                            | 64                     | 5.49                    | 1.88 x 10 <sup>-26</sup> |
| MEIS1_TGACAGNY                                        | 57                     | 6.14                    | 6.06 x 10 <sup>-26</sup> |
| <b>Up-regulated genes in miR-181d Tg thymocytes</b>   |                        |                         |                          |
| <b>Transcription factors with target motifs</b>       | <b>Number of genes</b> | <b>Enrichment ratio</b> | <b>Adjusted p-value</b>  |
| SP1_GGGCGGR                                           | 126                    | 3.07                    | 1.29 x 10 <sup>-26</sup> |
| E12_CAGGTG                                            | 106                    | 3.04                    | 4.62 x 10 <sup>-22</sup> |
| MYC_CACGTG                                            | 59                     | 4.09                    | 1.06 x 10 <sup>-17</sup> |
| MAZ_GGGAGGRR                                          | 89                     | 2.78                    | 3.85 x 10 <sup>-16</sup> |
| AP4_CAGCTG                                            | 69                     | 3.27                    | 6.78 x 10 <sup>-16</sup> |
| NFAT_TGAAA                                            | 78                     | 2.99                    | 6.90 x 10 <sup>-16</sup> |
| ETS2_RYTTCCTG                                         | 56                     | 3.72                    | 2.58 x 10 <sup>-15</sup> |
| LEF1_CTTTGA                                           | 76                     | 2.76                    | 9.74 x 10 <sup>-14</sup> |
| FOXO4_TTGTTT                                          | 77                     | 2.70                    | 1.79 x 10 <sup>-13</sup> |
| AP1_TGANTCA                                           | 51                     | 3.22                    | 1.04 x 10 <sup>-11</sup> |
